# Supplementary material for: How Users Experience and Use an eHealth Intervention Based on Self-Regulation: Mixed-Methods Study
Source: PubMed Central journal article supplement (PMC6231831; doi:10.2196/10412), 2018-10-01
Supplement: jmir_v20i10e10412_app3.pdf [file jmir_v20i10e10412_app3.pdf]

# Overview of the themes and subthemes

| Self-regulation technique                                                                                                                     |                     | Number of participants mentioning it positively | Number of participants mentioning it negatively |
|-----------------------------------------------------------------------------------------------------------------------------------------------|---------------------|-------------------------------------------------|-------------------------------------------------|
| <b>Website in general</b>                                                                                                                     | Awareness           | 19                                              | 5                                               |
|                                                                                                                                               | User-friendliness   | 20                                              | 16                                              |
|                                                                                                                                               | Lay-out             | 17                                              | 12                                              |
|                                                                                                                                               | General perception  | 19                                              | 16                                              |
|                                                                                                                                               | Personal relevance  | 17                                              | 11                                              |
|                                                                                                                                               | Time-efficiency     | 20                                              | 11                                              |
|                                                                                                                                               | Motivational value  | 19                                              | 14                                              |
|                                                                                                                                               | <b>Goal setting</b> |                                                 | 0                                               |
| <b>Providing information on the consequences of the behaviour</b>                                                                             | Informing value     | 11                                              | 16                                              |
|                                                                                                                                               | Knowledge           | 20                                              | 7                                               |
| <b>Providing feedback on performance</b>                                                                                                      | Awareness           | 9                                               | 1                                               |
|                                                                                                                                               | Personal relevance  | 11                                              | 1                                               |
|                                                                                                                                               | Motivational value  | 9                                               | 7                                               |
| <b>Action planning</b>                                                                                                                        | Motivational value  | 19                                              | 7                                               |
|                                                                                                                                               | User-friendliness   | 17                                              | 10                                              |
| <b>Barrier identification/problem-solving</b>                                                                                                 | Motivational value  | 14                                              | 11                                              |
|                                                                                                                                               | User-friendliness   | 9                                               | 13                                              |
| <b>Prompting self-monitoring of behaviour</b>                                                                                                 | User-friendliness   | 7                                               | 9                                               |
|                                                                                                                                               | Motivational value  | 15                                              | 15                                              |
| <b>Plan social support</b>                                                                                                                    | Motivational value  | 4                                               | 3                                               |
|                                                                                                                                               |                     |                                                 |                                                 |
| <b>Prompt review of behavioural goals</b>                                                                                                     | Motivational value  | 8                                               | 0                                               |
|                                                                                                                                               |                     |                                                 |                                                 |
| <b>Tips: prompting rewards, prompting focus on past success, providing instructions, teaching to use prompts/cues and prompting self-talk</b> |                     |                                                 |                                                 |

|                           |    |    |
|---------------------------|----|----|
| <b>User-friendliness</b>  | 12 | 9  |
| <b>Motivational value</b> | 18 | 13 |

---
